# Supplementary material for: Sulfur-doped mesoporous carbon via thermal reduction of CS2 by Mg for high-performance supercapacitor electrodes and Li-ion battery anodes
Source: Royal Society of Chemistry journal article supplement (doi:10.1039/c8ra01729h), 2018-01-01
Supplement: c8ra01729h1.pdf [file c8ra01729h1.pdf]

## Supporting Information

### **Sulfur-Doped Porous Carbon via Thermal Reduction of CS<sub>2</sub> by Mg for High-Performance Supercapacitor Electrodes and Li-Ion Battery Anodes**

Lu Sun,<sup>a</sup> Jinzhang Liu,<sup>a,\*</sup> Zehui Liu,<sup>a</sup> Teng Wang,<sup>b</sup> Hongxia Wang<sup>b</sup> and Yan Li<sup>a,\*</sup>

<sup>a</sup>School of Materials Science and Engineering, Beihang University, Beijing, 100191,  
China

<sup>b</sup>School of Chemistry, Physics, and Mechanical Engineering, Queensland University  
of Technology, Brisbane, 4001 QLD, Australia

Email: [ljz78@buaa.edu.cn](mailto:ljz78@buaa.edu.cn) (J. Liu) and [liyan@buaa.edu.cn](mailto:liyan@buaa.edu.cn) (Y. Li)

## 1. Capacitance calculation

The gravimetric specific capacitances ( $C_g$ ) was calculated using galvanostatic CD curves, according to the following equation:

$$C_g = (I\Delta t)/(\Delta V)$$

where  $I$  is the current density ( $A\ g^{-1}$ ),  $\Delta t$  is the time for a full discharge,  $\Delta V$  is the potential window.

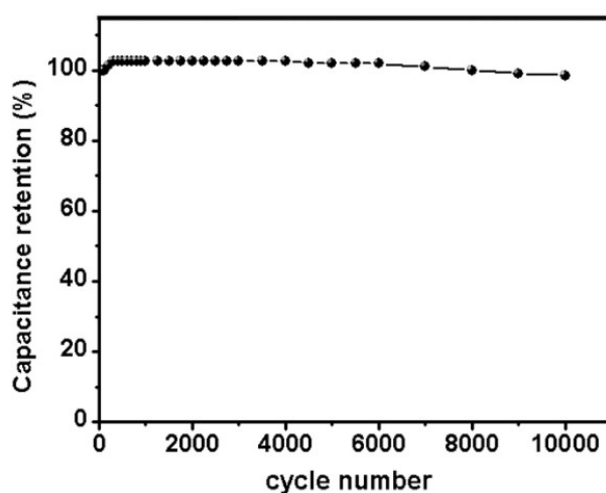

**Fig. S1.** The variation of capacitance retention of the supercapacitor electrode after running GCD at  $5\ A\ g^{-1}$  for different cycles.

## 2. Morphologies of S620 and S750 samples

**Figures S2a** and **S2b** show low- and high-magnification SEM images of the S620 carbon powder. When exposed to  $CS_2$  at high temperature, the Mg grain was converted into carbon layers of shells, each about few hundreds of nm in thickness and has fluffy carbon sheets in outer surface, as shown in **Fig. S2b**. SEM images in **Figs. S2c** and **S2d** were taken from the S750 sample. An interesting core-shell structure is unveiled by the broken ball with diameter in micrometre scale. Nevertheless, nanopores can be clearly

seen from the cross-sections of the ‘egg’ shell in **Fig. S2d** and the hull in **Fig. S2c**, confirming the mesoporous structure of our carbon product.

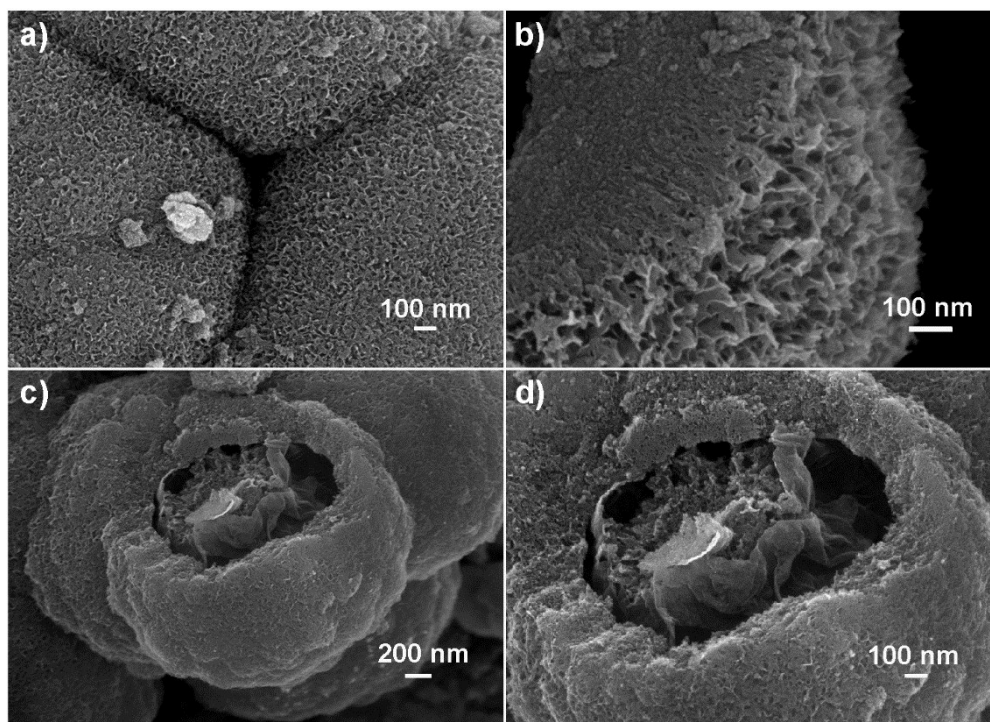

**Fig. S2.** SEM images of (a, b) S620 and (c, d) S750 samples. The mesoporous feature can be found from the cross-sections of carbon shells in (b) and (d).

**Figure S3** shows TEM images of S750 and S680 samples. Carbon sheets are ruffled and their surfaces are not as smooth as graphene. From the high-resolution image in **Figs. S3b** and **S3d**, nanoholes can be seen, as highlighted by dashed circle lines.

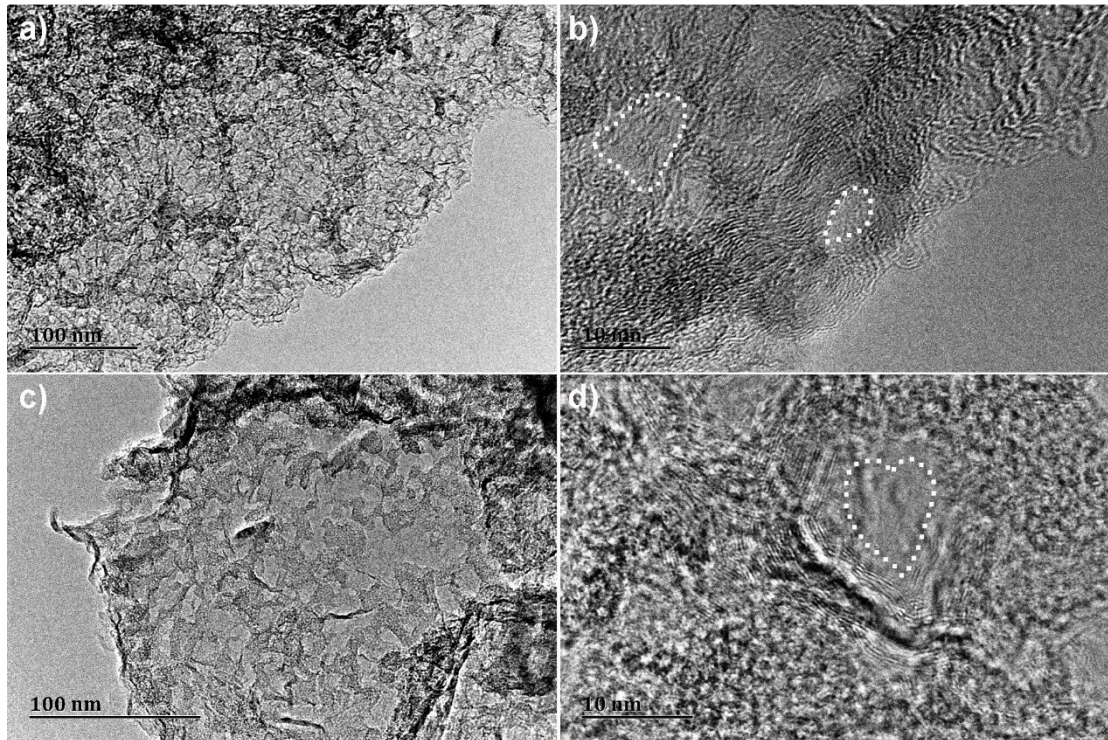

**Fig. S3.** Low- and high-resolution TEM images of the (a,b) S750 and (c,d) S680 samples. Nanoholes are marked by dashed-line circles.
